# Supplementary material for: A luminescent metal–organic framework as an ideal chemosensor for nitroaromatic compounds
Source: Royal Society of Chemistry journal article supplement (doi:10.1039/c7ra06320b), 2017-01-01
Supplement: c7ra06320b1.pdf [file c7ra06320b1.pdf]

## Supporting Information

### **A luminescent metal-organic framework as an ideal chemosensor for nitroaromatic compounds**

Hongming He,<sup>a</sup> Si-Hang Chen,<sup>a</sup> De-Yu Zhang,<sup>a</sup> En-Cui Yang<sup>a\*</sup> and Xiao-Jun Zhao<sup>a, b\*</sup>

† Key Laboratory of Inorganic-Organic Hybrid Functional Material Chemistry, Ministry of Education, Tianjin Key Laboratory of Structure and Performance for Functional Molecules, College of Chemistry, Tianjin Normal University, Tianjin 300387, P. R. China.

‡ Department of Chemistry, Collaborative Innovation Center of Chemical Science and Engineering, Nankai University, Tianjin 300071, P. R. China.

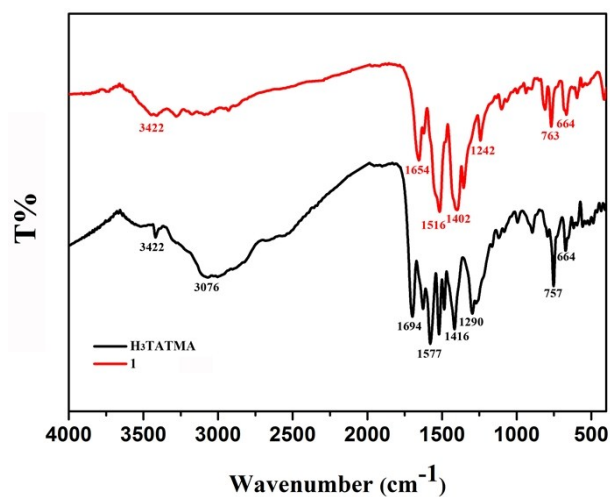

**Fig. S1** The FT-IR spectra of  $\text{H}_3\text{TATMA}$  (black) and **1** (red).

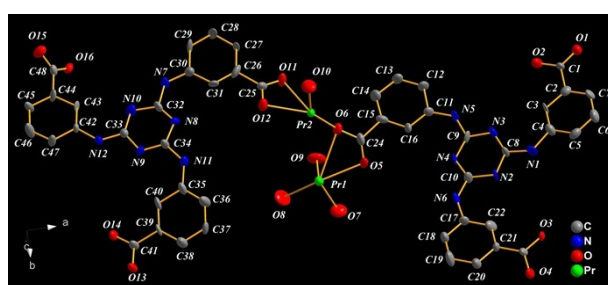

**Fig. S2** The asymmetric unit of **1**.

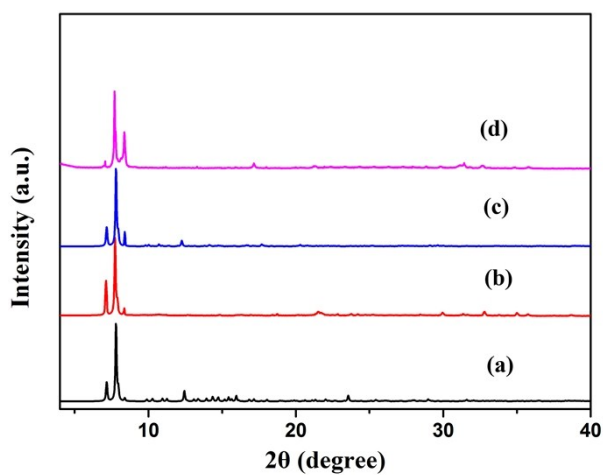

**Fig. S3** The PXRD patterns of simulated (a), the as-synthesized **1** (b), **1** immersed in DMF after one week (c), and **1** dispersed in DMF with NB of 600 ppm after repeated five times (d).

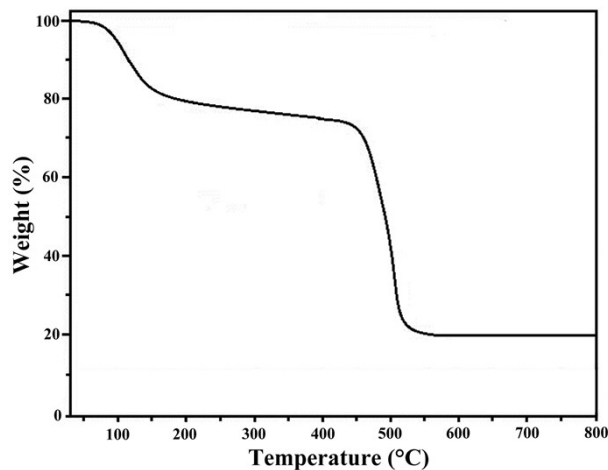

Fig. S4 The TGA plots of **1** in air condition.

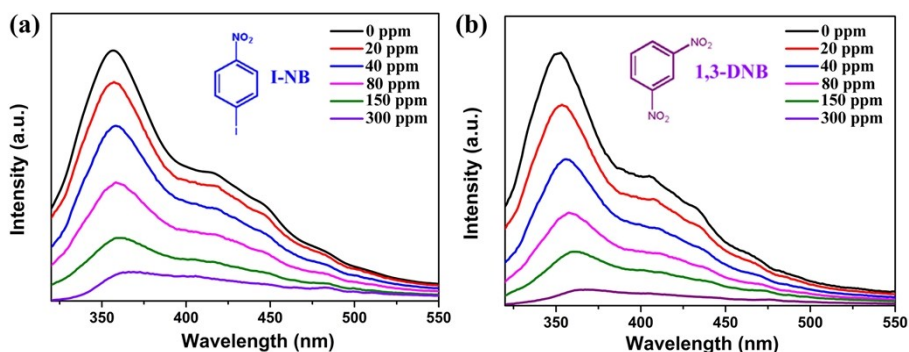

Fig. S5 Emission spectra of **1** titrated with I-NB (a) and 1,3-DNB (b) in DMF about 2 minutes, respectively.

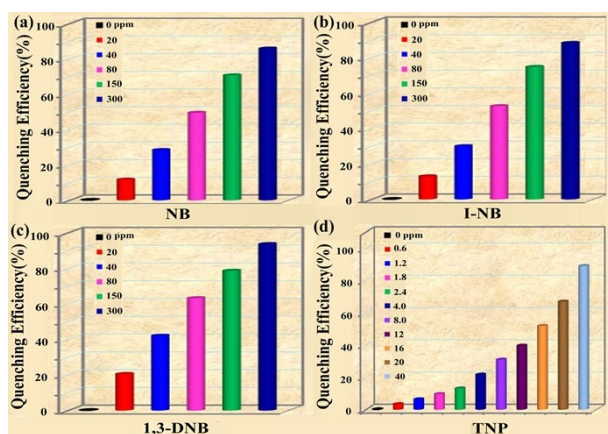

Fig. S6 The corresponding quenching efficiency of **1** titrated with NB (a), I-NB (b), 1,3-DNB (c) and TNP (d) in DMF, respectively. The quenching efficiency (%) was estimated using the formula  $(I_0 - I)/I_0 \times 100\%$ , where  $I_0$  is the maximum luminescent intensity of **1** before exposure to the analyte and  $I$  is the luminescent intensity for any given concentration of quencher.

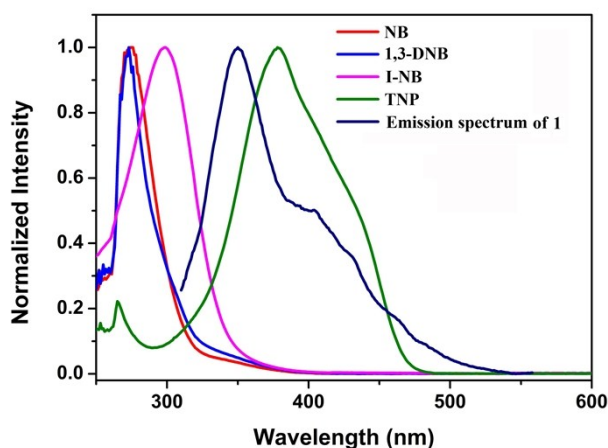

Fig. S7 The spectral overlap between the absorption spectra of analytes and the emission spectrum of **1**.

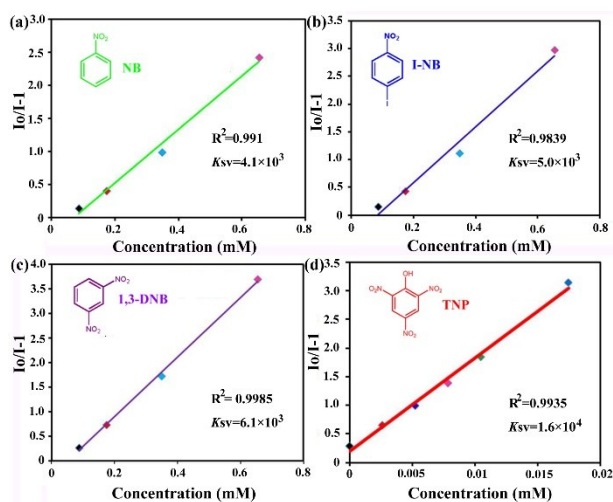

Fig. S8 The Stern-Volmer plots for **1** with NB (a), I-NB (b), 1,3-DNB (c) and TNP (d) at low concentrations, respectively.

The solid lines fit to the concentration-resolved data using Stern-Volmer equation.

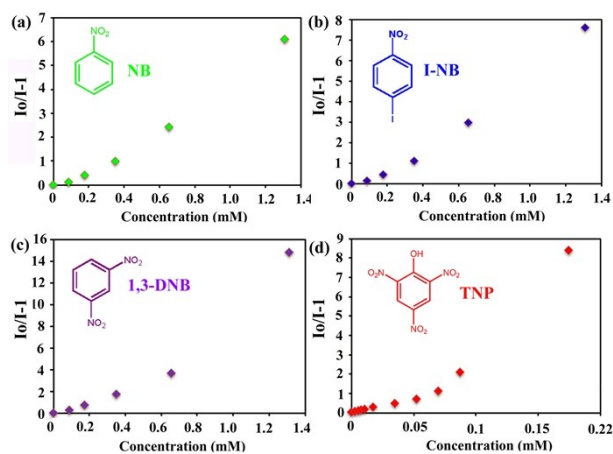

Fig. S9 The Stern-Volmer plot for NB (a), I-NB (b), 1,3-DNB (c) and TNP (d) in full concentration region, respectively.

Table S1 Selected bond lengths (Å) and angles (deg) for **1**.

| <b>1</b>     |          |              |          |
|--------------|----------|--------------|----------|
| O(1)-Pr(1)#1 | 2.598(8) | O(2)-Pr(1)#1 | 2.494(8) |
| O(3)-Pr(2)#2 | 2.564(8) | O(3)-Pr(1)#2 | 2.649(7) |

---

|                       |           |                      |           |
|-----------------------|-----------|----------------------|-----------|
| O(4)-Pr(1)#2          | 2.676(8)  | O(5)-Pr(1)           | 2.499(8)  |
| O(6)-Pr(2)            | 2.479(7)  | O(6)-Pr(1)           | 2.807(8)  |
| O(7)-Pr(1)            | 2.513(11) | O(8)-Pr(1)           | 2.524(11) |
| O(9)-Pr(1)            | 2.528(9)  | O(10)-Pr(2)          | 2.480(10) |
| O(11)-Pr(2)           | 2.450(9)  | O(12)-Pr(2)          | 2.515(8)  |
| O(13)-Pr(2)#3         | 2.527(8)  | O(14)-Pr(2)#3        | 2.496(7)  |
| O(15)-Pr(2)#4         | 2.517(8)  | O(16)-Pr(1)#4        | 2.520(8)  |
| O(16)-Pr(2)#4         | 2.648(8)  | Pr(1)-O(2)#3         | 2.494(8)  |
| Pr(1)-O(16)#2         | 2.520(8)  | Pr(1)-O(1)#3         | 2.598(9)  |
| Pr(1)-O(3)#4          | 2.649(7)  | Pr(1)-O(4)#4         | 2.676(8)  |
| Pr(2)-O(14)#1         | 2.496(7)  | Pr(2)-O(15)#2        | 2.517(8)  |
| Pr(2)-O(13)#1         | 2.527(8)  | Pr(2)-O(3)#4         | 2.564(8)  |
| Pr(2)-O(16)#2         | 2.648(8)  |                      |           |
| O(2)#3-Pr(1)-O(5)     | 120.6(3)  | O(2)#3-Pr(1)-O(16)#2 | 89.5(3)   |
| O(5)-Pr(1)-O(16)#2    | 78.1(3)   | O(2)#3-Pr(1)-O(7)    | 78.2(3)   |
| O(5)-Pr(1)-O(7)       | 78.6(3)   | O(16)#2-Pr(1)-O(7)   | 143.0(3)  |
| O(2)#3-Pr(1)-O(9)     | 140.4(3)  | O(5)-Pr(1)-O(9)      | 78.8(3)   |
| O(16)#2-Pr(1)-O(9)    | 129.8(3)  | O(7)-Pr(1)-O(9)      | 72.1(3)   |
| O(2)#3-Pr(1)-O(8)     | 78.1(3)   | O(5)-Pr(1)-O(8)      | 142.0(3)  |
| O(16)#2-Pr(1)-O(8)    | 138.4(3)  | O(7)-Pr(1)-O(8)      | 73.3(4)   |
| O(9)-Pr(1)-O(8)       | 68.6(3)   | O(2)#3-Pr(1)-O(1)#3  | 50.4(3)   |
| O(5)-Pr(1)-O(1)#3     | 70.5(3)   | O(16)#2-Pr(1)-O(1)#3 | 73.5(3)   |
| O(7)-Pr(1)-O(1)#3     | 71.8(3)   | O(9)-Pr(1)-O(1)#3    | 136.2(3)  |
| O(8)-Pr(1)-O(1)#3     | 122.0(3)  | O(2)#3-Pr(1)-O(3)#4  | 120.7(2)  |
| O(5)-Pr(1)-O(3)#4     | 110.2(2)  | O(16)#2-Pr(1)-O(3)#4 | 72.3(2)   |
| O(7)-Pr(1)-O(3)#4     | 143.5(3)  | O(9)-Pr(1)-O(3)#4    | 75.0(3)   |
| O(8)-Pr(1)-O(3)#4     | 80.3(3)   | O(1)#3-Pr(1)-O(3)#4  | 144.7(3)  |
| O(2)#3-Pr(1)-O(4)#4   | 72.4(2)   | O(5)-Pr(1)-O(4)#4    | 147.3(3)  |
| O(16)#2-Pr(1)-O(4)#4  | 71.9(2)   | O(7)-Pr(1)-O(4)#4    | 133.9(3)  |
| O(9)-Pr(1)-O(4)#4     | 111.0(3)  | O(8)-Pr(1)-O(4)#4    | 66.5(3)   |
| O(1)#3-Pr(1)-O(4)#4   | 111.8(2)  | O(3)#4-Pr(1)-O(4)#4  | 48.3(2)   |
| O(2)#3-Pr(1)-O(6)     | 153.7(3)  | O(5)-Pr(1)-O(6)      | 48.3(2)   |
| O(16)#2-Pr(1)-O(6)    | 65.8(2)   | O(7)-Pr(1)-O(6)      | 115.9(3)  |
| O(9)-Pr(1)-O(6)       | 65.5(3)   | O(8)-Pr(1)-O(6)      | 126.1(3)  |
| O(1)#3-Pr(1)-O(6)     | 110.6(3)  | O(3)#4-Pr(1)-O(6)    | 61.9(2)   |
| O(4)#4-Pr(1)-O(6)     | 105.8(2)  | O(11)-Pr(2)-O(6)     | 104.1(3)  |
| O(11)-Pr(2)-O(10)     | 87.0(3)   | O(6)-Pr(2)-O(10)     | 148.6(3)  |
| O(11)-Pr(2)-O(14)#1   | 74.5(3)   | O(6)-Pr(2)-O(14)#1   | 81.2(3)   |
| O(10)-Pr(2)-O(14)#1   | 73.6(3)   | O(11)-Pr(2)-O(12)    | 52.3(3)   |
| O(6)-Pr(2)-O(12)      | 136.8(3)  | O(10)-Pr(2)-O(12)    | 72.9(3)   |
| O(14)#1-Pr(2)-O(12)   | 117.2(3)  | O(11)-Pr(2)-O(15)#2  | 124.6(3)  |
| O(6)-Pr(2)-O(15)#2    | 118.5(3)  | O(10)-Pr(2)-O(15)#2  | 74.9(3)   |
| O(14)#1-Pr(2)-O(15)#2 | 141.8(3)  | O(12)-Pr(2)-O(15)#2  | 72.4(3)   |
| O(11)-Pr(2)-O(13)#1   | 125.7(3)  | O(6)-Pr(2)-O(13)#1   | 74.6(3)   |

---

---

|                       |          |                       |          |
|-----------------------|----------|-----------------------|----------|
| O(10)-Pr(2)-O(13)#1   | 75.1(3)  | O(14)#1-Pr(2)-O(13)#1 | 51.4(2)  |
| O(12)-Pr(2)-O(13)#1   | 148.0(3) | O(15)#2-Pr(2)-O(13)#1 | 99.7(3)  |
| O(11)-Pr(2)-O(3)#4    | 80.5(3)  | O(6)-Pr(2)-O(3)#4     | 67.7(3)  |
| O(10)-Pr(2)-O(3)#4    | 143.7(3) | O(14)#1-Pr(2)-O(3)#4  | 133.5(3) |
| O(12)-Pr(2)-O(3)#4    | 72.5(3)  | O(15)#2-Pr(2)-O(3)#4  | 84.5(3)  |
| O(13)#1-Pr(2)-O(3)#4  | 138.8(3) | O(11)-Pr(2)-O(16)#2   | 151.9(3) |
| O(6)-Pr(2)-O(16)#2    | 68.9(2)  | O(10)-Pr(2)-O(16)#2   | 113.4(3) |
| O(14)#1-Pr(2)-O(16)#2 | 128.3(2) | O(12)-Pr(2)-O(16)#2   | 113.4(2) |
| O(15)#2-Pr(2)-O(16)#2 | 50.2(3)  | O(13)#1-Pr(2)-O(16)#2 | 79.9(2)  |
| O(3)#4-Pr(2)-O(16)#2  | 71.6(2)  |                       |          |

Symmetry transformations used to generate equivalent atoms:

#1  $x + 1/2, y - 1/2, z$     #2  $x + 1/2, y + 1/2, z$     #3  $x - 1/2, y + 1/2, z$     #4  $x - 1/2, y - 1/2, z$

---
